# Supplementary material for: Bioassay-Guided Isolation of Anti-Candida Biofilm Compounds From Methanol Extracts of the Aerial Parts of Salvia officinalis (Annaba, Algeria)
Source: Front Pharmacol. 2018 Dec 10;9:1418. doi: 10.3389/fphar.2018.01418 (PMC6295571; doi:10.3389/fphar.2018.01418)
Supplement: Supplementary file 1 [file Data_Sheet_1.docx]

Supplementary Material

# Bioassay-Guided Isolation of Anti-Candida Biofilm compounds From Methanol Extracts of the Aerial Parts of *Salvia officinalis* (Annaba, Algeria)

Neila Kerkoub1¥*, Sujogya Kumar Panda2¥*, Ming-Rong Yang3, Jing-Guang Lu3, Zhi-Hong Jiang3, Hichem Nasri1, Walter Luyten2

*** Correspondence**

Neila kerkoub (neilaker23@gmail.com ), Sujogya Kumar Panda (sujogyapanda@gmail.com)

# Supplementary Data (HRMS and NMR spectrum)

|  |
| --- |
|  |

**Figure 1.** HRMS spectrum and data of **WL-04**

| Formula | Score | *m/z* (Calc) | Diff(ppm) | Ion Formula | *m/z* |
| --- | --- | --- | --- | --- | --- |
| C20H26O4 | 100 | 331.1904 | -1.1 | C20H26O4 | 331.1908 |
| C20H26O4 | 57.38 | 329.1758 | -2.8 | C20H26O4 | 329.1768 |


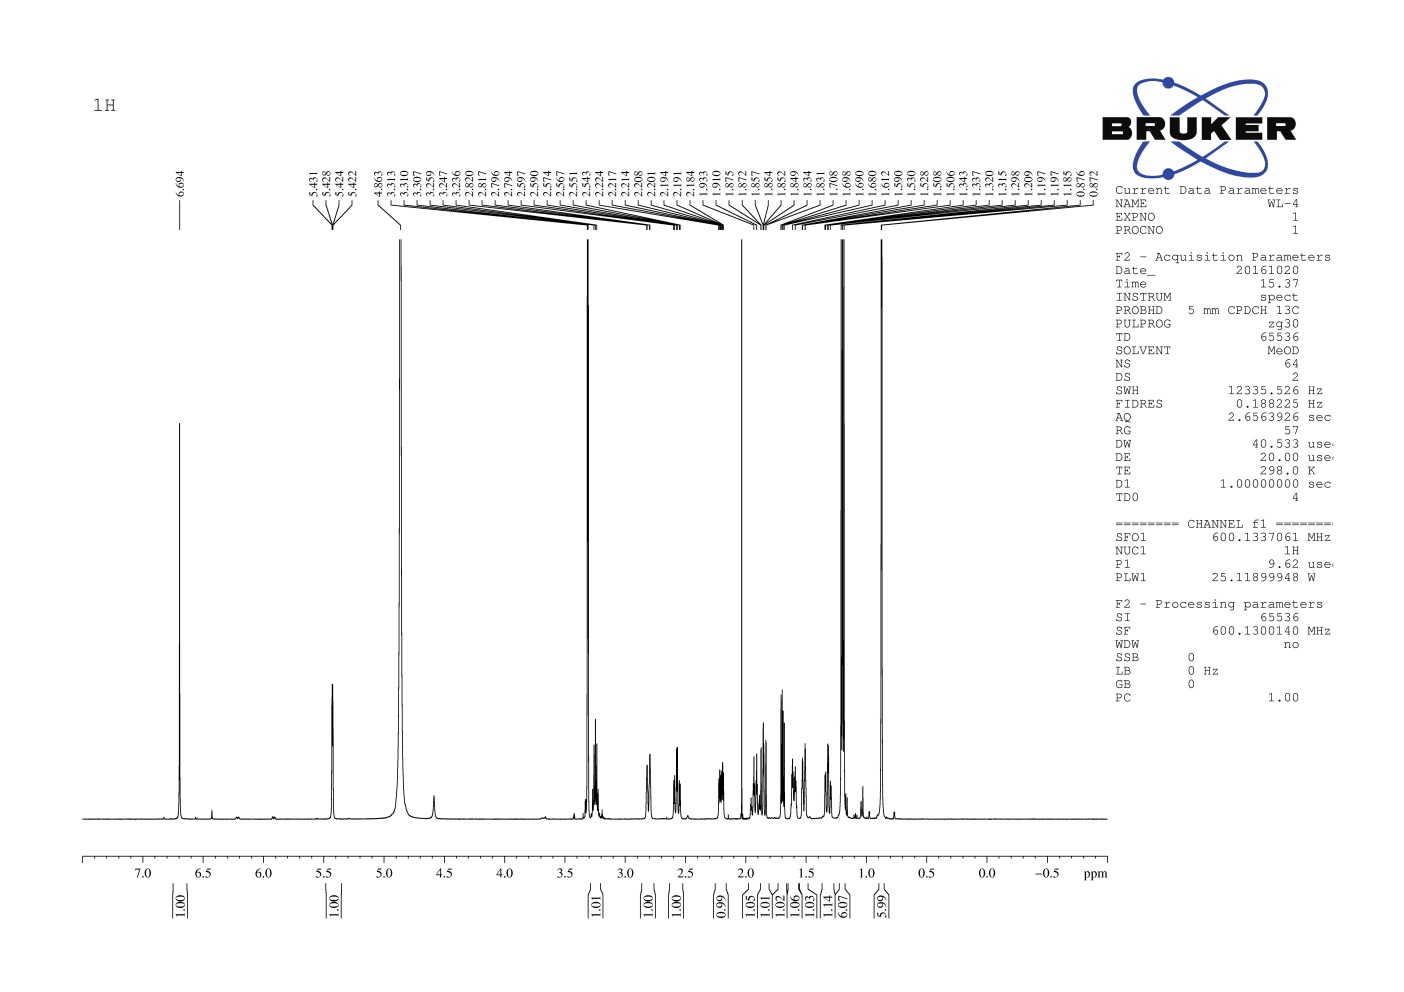


**Figure 2.** 1H-NMR spectrum of **WL-04**


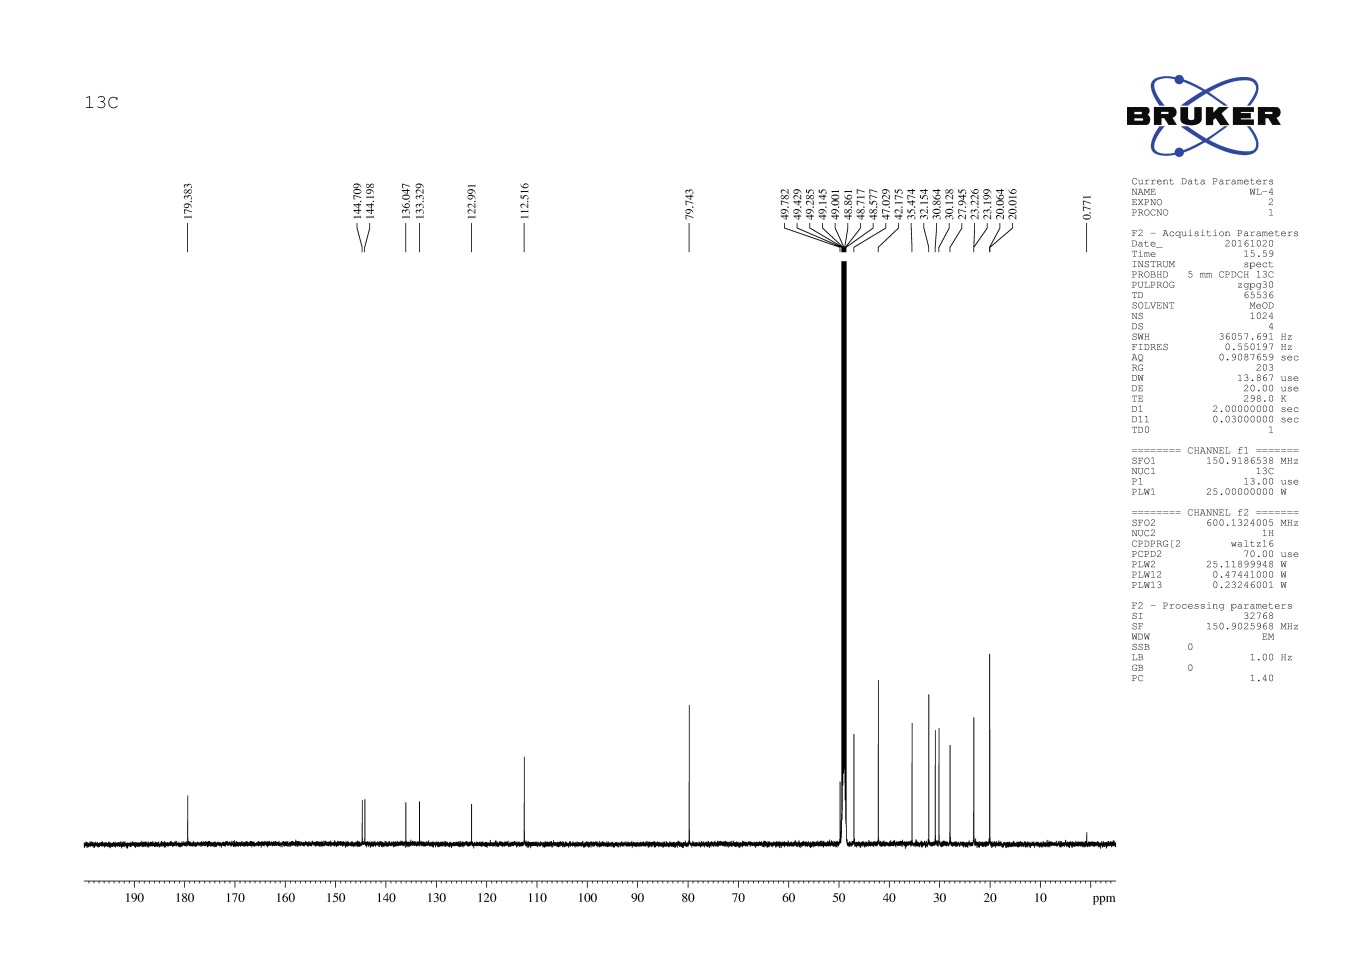


**Figure 3.** 13C-NMR spectrum of **WL-04**

|  |
| --- |
|  |

| Formula | Score | *m/z* (Calc) | Diff(ppm) | Ion Formula | *m/z* |
| --- | --- | --- | --- | --- | --- |
| C21H30O4 | 100 | 347.2217 | -0.2 | C21H30O4 | 347.2218 |
| C21H30O4 | 100 | 345.2071 | -3.4 | C21H30O4 | 345.2083 |

**Figure 4.** HRMS spectrum and data of **WL-12**


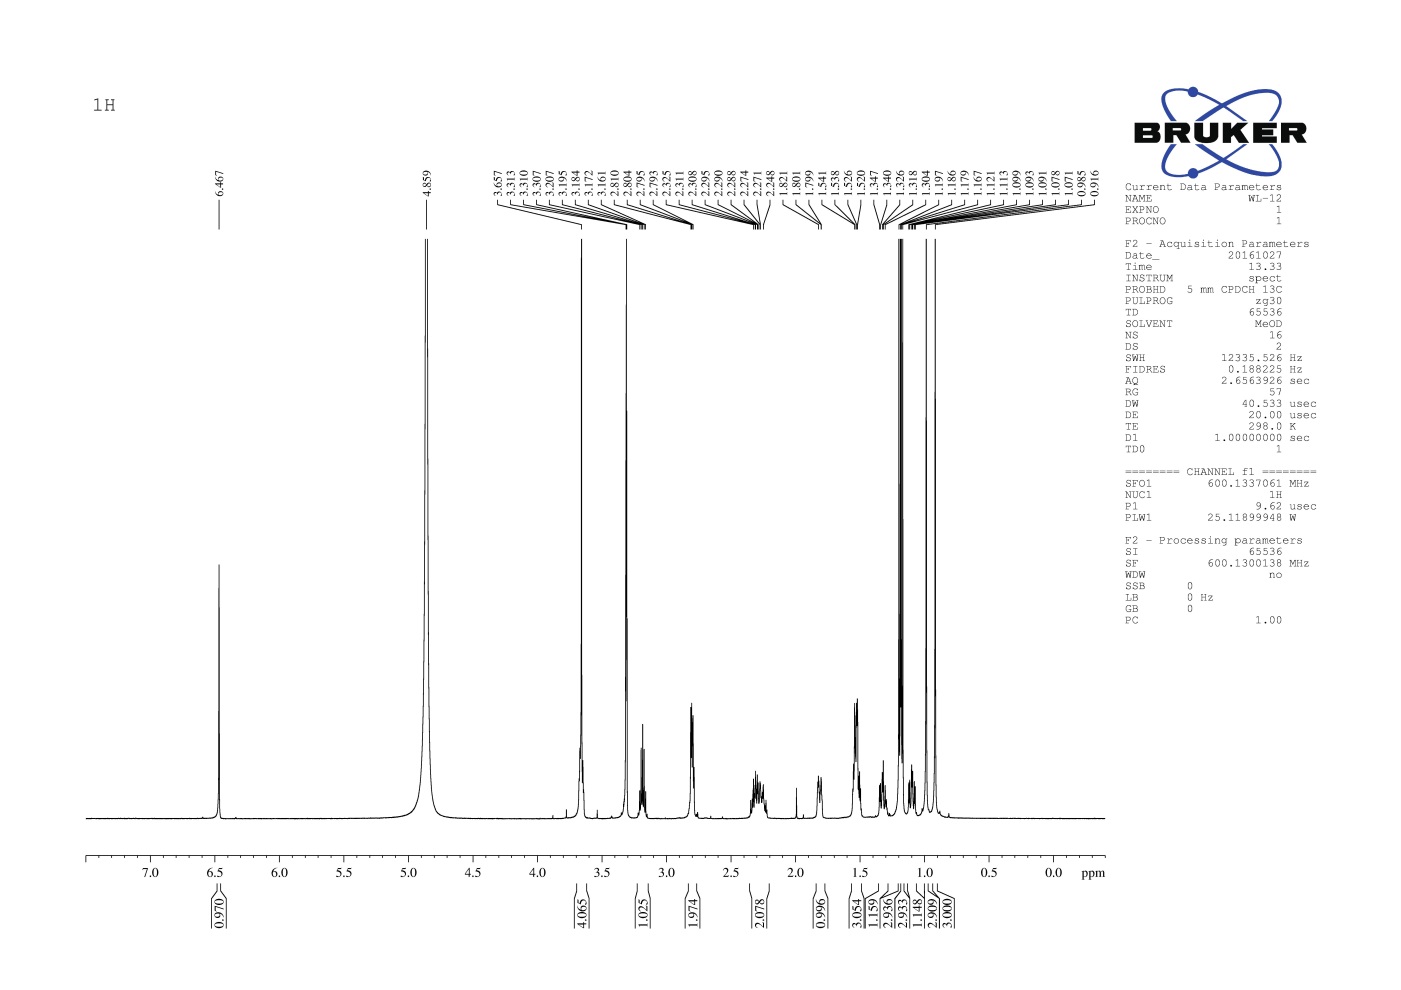


**Figure 5.** 1H-NMR spectrum of **WL-12**

***
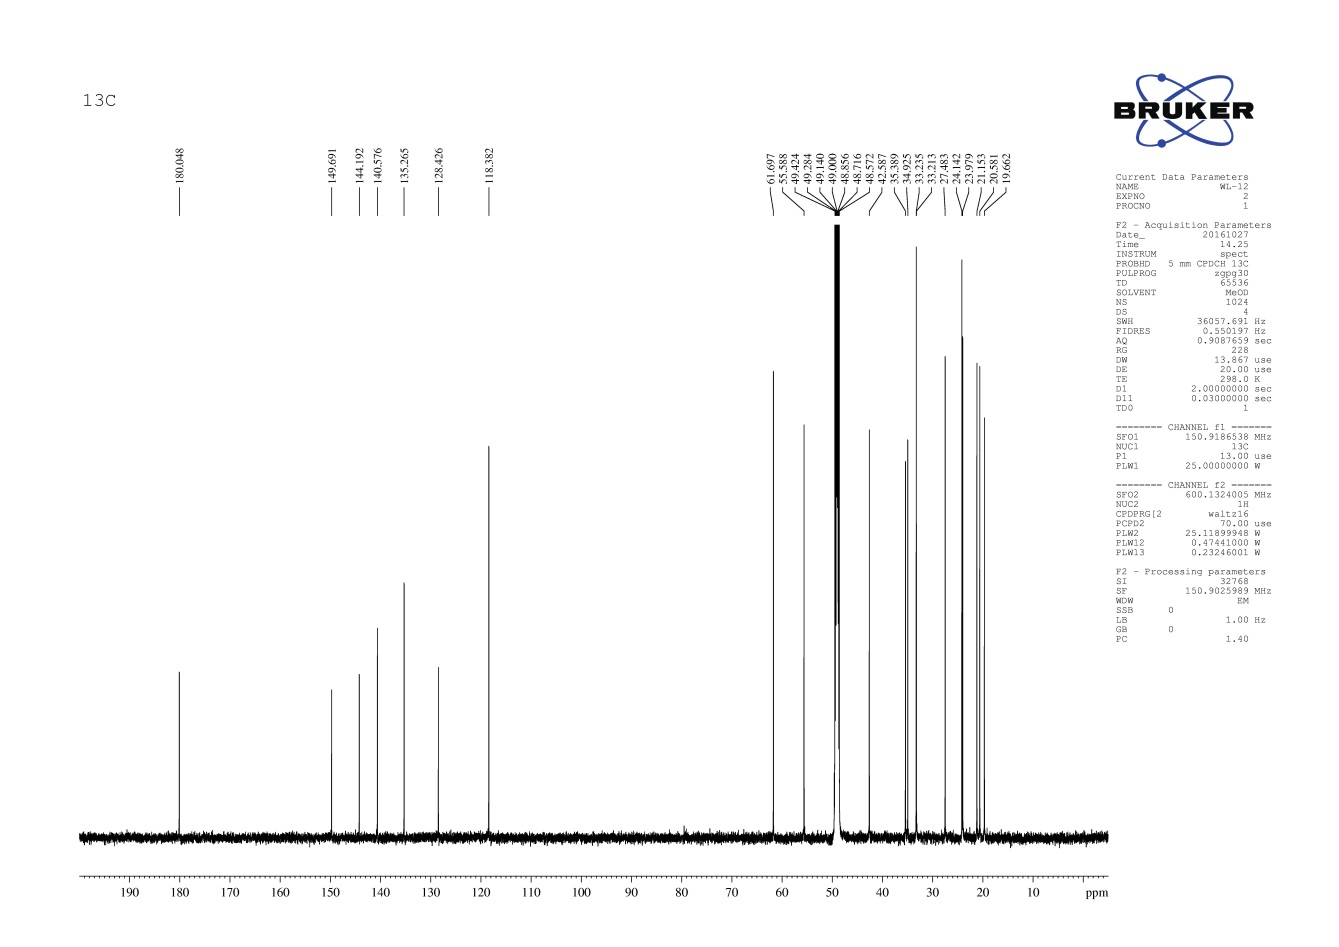
***

**Figure 6.** 13C-NMR spectrum of **WL-12**


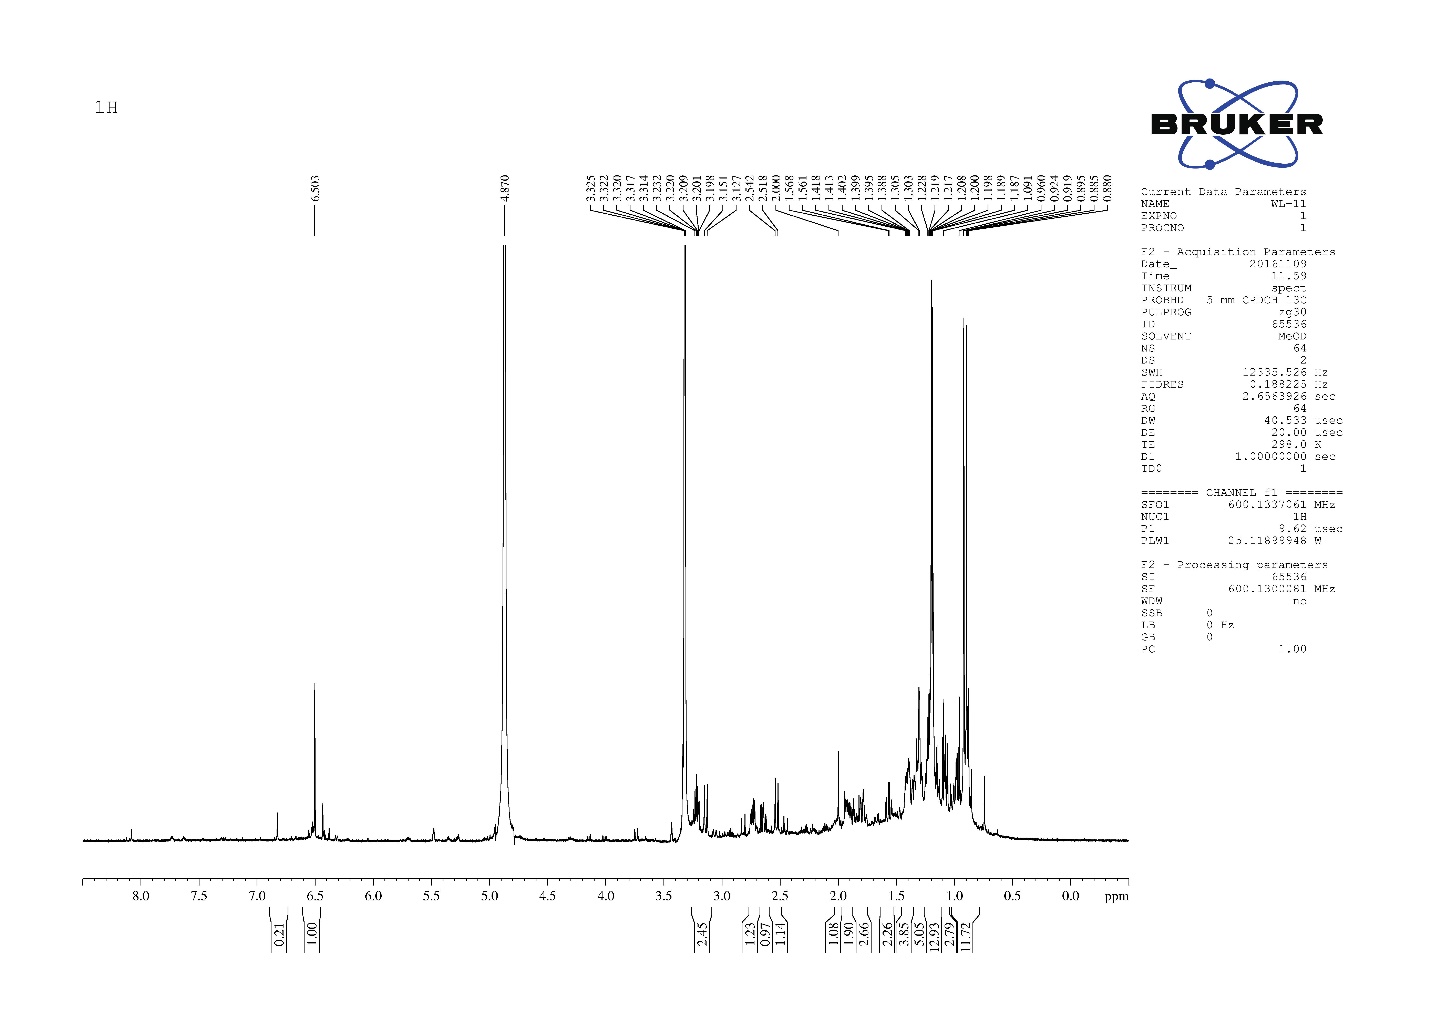


**Figure 7.** 1H-NMR spectrum of **WL-11**


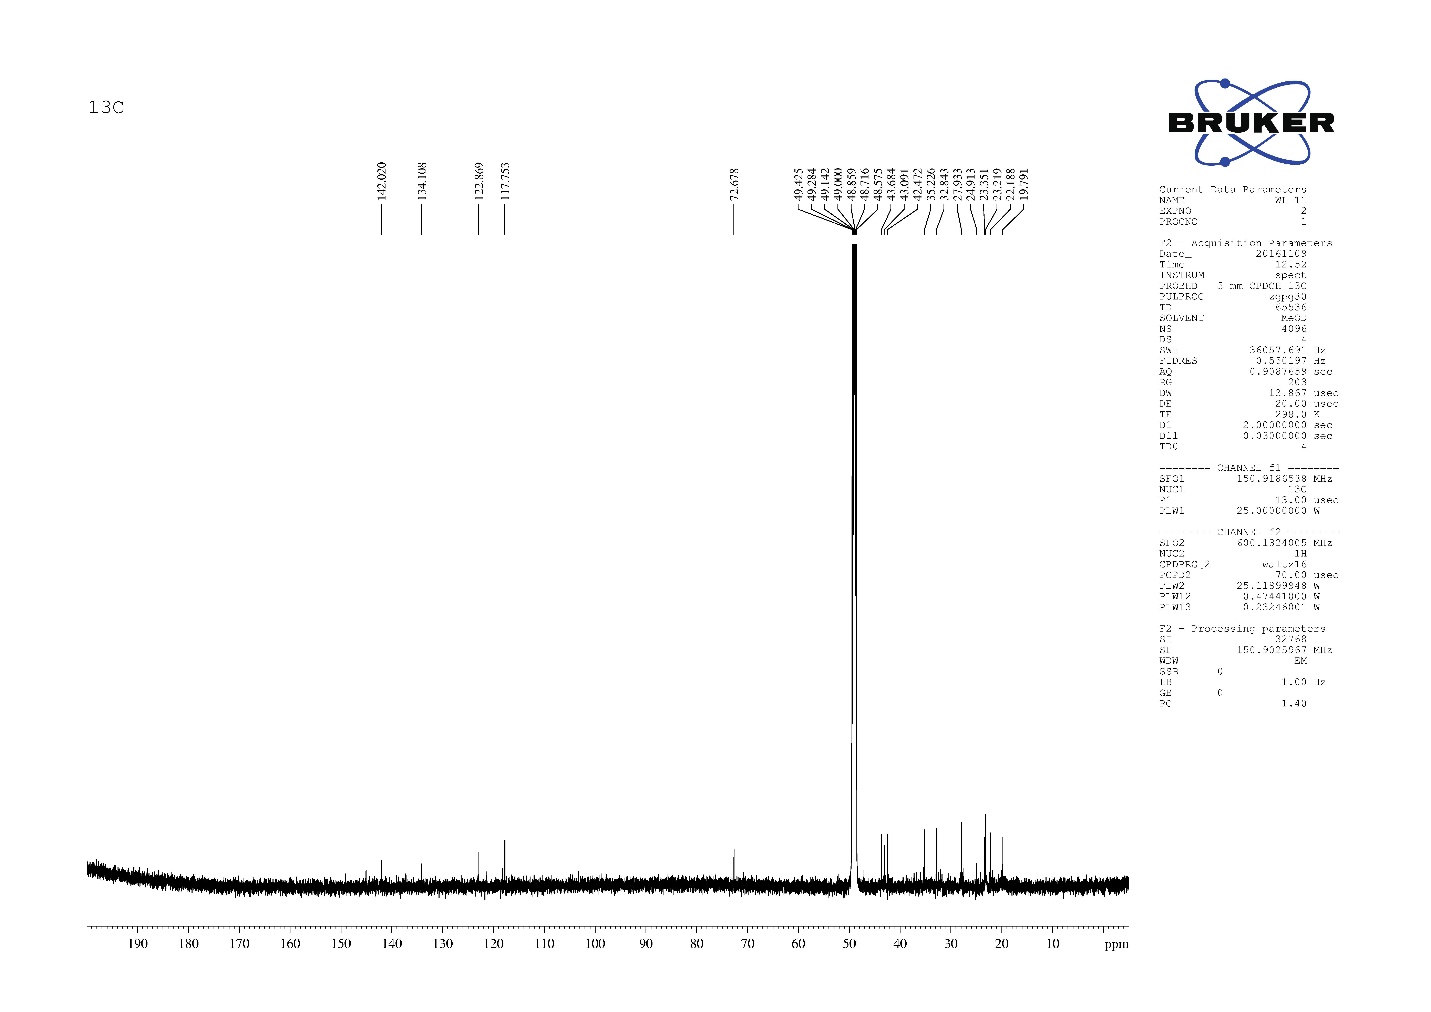


**Figure 8.** 13C-NMR spectrum of **WL-11**

**Figure 9.** HRMS spectrum and data of **WL-11;** [Formula: C16H26N6O([M-H]-= 317.2095, -4.9ppm)
